# Supplementary material for: Sociodemographic, behavioral, and environmental factors of child mortality in Eastern Region of Cameroon: results from a social autopsy study
Source: J Glob Health. 2017 Mar 7;7(1):010601. doi: 10.7189/jogh.07.010601 (PMC5344009; doi:10.7189/jogh.07.010601)
Supplement: Online Supplementary Document [file jogh-07-010601-s001.pdf]

# Online Supplementary Document

Koffi et al. Sociodemographic, behavioral, and environmental factors of child mortality in Eastern Region of Cameroon: results from a social autopsy study

J Glob Health 2017;7:010601

## SYMPTOM SEVERITY SCORING SYSTEM

| CHILDREN 1-59 MONTHS OF AGE | Possibly Severe Illness Sign                | Severe Illness Sign                                  |
|-----------------------------|---------------------------------------------|------------------------------------------------------|
|                             | Fever and Skin rash or Fever alone          | Fever and Stiff neck                                 |
|                             | Loose stools/ diarrhea for 3 days or more   | Loose stools/ diarrhea for 3 days or more            |
|                             | Visible blood in the loose or liquid stools | Very severe cough                                    |
|                             | Cough                                       | Vomit after cough                                    |
|                             | Difficult breathing                         | Indrawing of the chest                               |
|                             | Fast breathing                              | Stridor                                              |
|                             | Skin rash                                   | Grunting                                             |
|                             | Blisters containing clear fluid             | Wheezing                                             |
|                             | Limbs (legs, arms) become very thin         | Convulsions                                          |
|                             | Swelling in the armpits                     | Unconscious                                          |
|                             |                                             | Stiff neck                                           |
|                             |                                             | Bulging fontanelle                                   |
|                             |                                             | Swollen legs or feet                                 |
|                             |                                             | skin flake off in patches                            |
|                             |                                             | Hair change in color to a reddish or yellowish color |
|                             |                                             | Protruding belly                                     |
|                             |                                             | Lack of blood or pallor                              |
|                             |                                             | Whitish rash inside the mouth or on the tongue       |
|                             |                                             | Bleeding from anywhere                               |
|                             |                                             | Areas of the skin that turned black                  |
|                             |                                             | Road traffic crash/injury                            |
|                             |                                             | Fall                                                 |
|                             |                                             | Drowning                                             |
|                             |                                             | Poisoning                                            |
|                             |                                             | Bite or sting by a venomous animal                   |
|                             |                                             | Burn                                                 |
|                             |                                             | From violence (homicide, abuse)                      |
|                             |                                             | Any other injury                                     |
